# Supplementary material for: Spatiotemporal Patterns in pCO2 and Nutrient Concentration: Implications for the CO2 Variations in a Eutrophic Lake
Source: MDPI journal article supplement (doi:10.3390/ijerph191912150), 2022-09-25
Supplement: s1 [file s1]

# Spatiotemporal Patterns in pCO<sub>2</sub> and Nutrient Concentration: Implications for the CO<sub>2</sub> Variations in a Eutrophic Lake

Jie Xu <sup>1</sup>, Zheng Zhou <sup>1</sup>, Jie Chen <sup>1</sup>, Haihua Zhuo <sup>1</sup>, Jie Ma <sup>2,\*</sup> and Yunbing Liu <sup>1,\*</sup>

<sup>1</sup> Yangtze River Basin Ecological Environment Monitoring and Scientific Research Center, Yangtze River Basin Ecological Environment Supervision and Administration Bureau, Ministry of Ecology and Environment, Wuhan 430010, China

<sup>2</sup> Nanjing Institute of Environment Sciences, Ministry of Ecology and Environment, Nanjing 210023, China

\* Correspondence: majie@nies.org (J.M.); yunbing\_liu@163.com (Y.L.)

## Text 1. Calculations of pCO<sub>2</sub>

The long-term pCO<sub>2</sub> (μatm) in this study were calculated from the water temperature, total alkalinity (TA), and pH. The detailed calculation procedures is as follows:

$$pCO_2 = 1000 \times [(TA + [H^+] - [OH^-]) / (a_1 + 2a_2)] / (K_1/[H^+] + K_1 \times K_2/[H^+]^2 + 1) / K_H \quad (S1)$$

where K<sub>1</sub> and K<sub>2</sub> are the first and second dissociation constant in the classical carbonate chemical system, respectively, and were calculated from water temperature (T<sub>w</sub>, in K):

$$\log_{10}K_1 = -356.3094 - 0.06091964T_w - 21834.37/T_w + 126.8339 \log_{10}T_w - 1684915/T_w^2 \quad (S2)$$

$$\log_{10}K_2 = -107.8871 - 0.03252849T_w + 5151.79/T_w + 38.92561 \log_{10}T_w - 563713.9/T_w \quad (S3)$$

a<sub>1</sub> and a<sub>2</sub> are the ionization fractions with available concentrations of [H<sup>+</sup>] and [OH<sup>-</sup>], which were calculated from pH, and are calculated as follows:

$$a_1 = ([H^+]/K_1 + 1 + K_2/[H^+])^{-1} \quad (S4)$$

$$a_2 = ([H^+]^2/(K_1 \times K_2) + [H^+]/K_1 + 1)^{-1} \quad (S5)$$

K<sub>H</sub> is the Henry's constant, and is adjusted by water temperature:

$$\log_{10}K_H = 108.3865 + 0.01985076T_w - 6919.53 / T_w - 40.45154 \log_{10}T_w + 669365 / T_w^2 \quad (S6)$$

## Text 2. Calculations for the saturations of CO<sub>2</sub> and DO

For CO<sub>2</sub> saturation:

$$S_{gas} = \frac{C_w}{C_{eq}} \times 100\% \quad (S7)$$

Where S<sub>gas</sub> is the CO<sub>2</sub> saturation in surface water (%), C<sub>w</sub> is the CO<sub>2</sub> concentrations in the water, C<sub>eq</sub> is the CO<sub>2</sub> concentration in the water that is in equilibrium with their atmospheric concentrations at the surface water temperature, C<sub>w</sub> and C<sub>eq</sub> were calculated according to Wanninkhof. (2014)[1]:

$$\ln \beta = A_1 + A_2(100/T) + A_3 \ln (T/100) + S [B_1 + B_2(T/100) + B_3(T/100)^2] \quad (S8)$$

Where β is the Bunsen coefficient (μmol L<sup>-1</sup> atm<sup>-1</sup>), T is the water temperature in Kelvin (K), S is the salinity in water (‰), A<sub>i</sub> and B<sub>i</sub> are constants listed in Table S1. Taihu Lake is a freshwater lake, here, we supposed S ≈ 0.

**Table S1.** Coefficients for the temperature and salinity dependence of solubility of CO<sub>2</sub>.

| Gas             | A <sub>1</sub> | A <sub>2</sub> | A <sub>3</sub> | B <sub>1</sub> | B <sub>2</sub> | B <sub>3</sub> |
|-----------------|----------------|----------------|----------------|----------------|----------------|----------------|
| CO <sub>2</sub> | -58.0931       | 90.5069        | 22.2940        | 0.027766       | -0.025888      | 0.0050578      |

The average annual atmospheric pCO<sub>2</sub> were provided by the NOSS/ESRL (<http://www.esrl.noaa.gov> (accessed on 1 April 2020)), the dynamics of atmospheric pCO<sub>2</sub> from 1992 to 2006 were shown in Fig. S1.

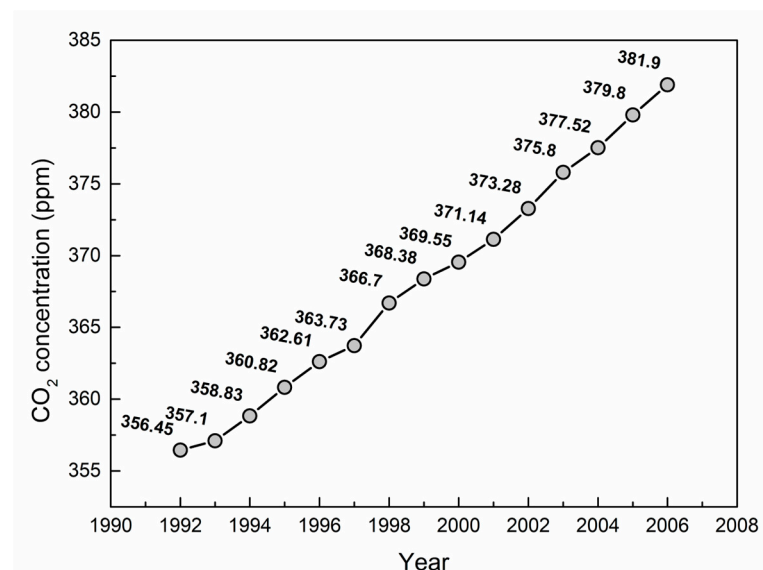

**Figure S1.** The annual average atmospheric pCO<sub>2</sub> from 1992 to 2006.

For DO saturation calculation:

DO<sub>sat</sub> in mg L<sup>-1</sup> was defined according to Benson and Krause Jr. (1984)[2]:

$$DO_{sat} = \exp(-139.34411 + 1.575701 \times 10^5 \times T^{-1} - 6.642308 \times 10^7 \times T^{-2} + 1.2438 \times 10^{10} \times T^{-3} - 8.621949 \times 10^{11} \times T^{-4}) \quad (S9)$$

$$S_{DO} = \frac{DO_{sat}}{DO_w} \times 100\% \quad (S10)$$

Where DO<sub>w</sub> is the DO concentrations in the water, T is the water temperature in Kelvin (K).

**Table S2.** The numbers of the parameters included in Fig. 2.

| Parameters | pH  | TA  | SDO | EC  | TN  | TP  | NH <sub>4</sub> <sup>+</sup> -N | Chl-a |
|------------|-----|-----|-----|-----|-----|-----|---------------------------------|-------|
| Z1         | 342 | 342 | 321 | 344 | 348 | 347 | 336                             | 337   |
| Z2         | 684 | 691 | 529 | 693 | 695 | 693 | 556                             | 672   |
| Z3         | 342 | 342 | 267 | 343 | 347 | 347 | 281                             | 334   |

**Table S3.** Standardized loadings of each parameter in PCA analysis.

| Variable                      | Dim1  | Dim2  |
|-------------------------------|-------|-------|
| pH                            | -0.13 | 0.13  |
| TN                            | 0.18  | -0.03 |
| TP                            | 0.13  | 0.30  |
| Chl-a                         | 0.01  | 0.35  |
| DO                            | -0.10 | -0.18 |
| NH <sub>4</sub> <sup>+</sup>  | 0.17  | -0.01 |
| TA                            | 0.16  | -0.11 |
| T                             | -0.04 | 0.32  |
| EC                            | 0.13  | -0.13 |
| PO <sub>4</sub> <sup>3-</sup> | 0.15  | 0.17  |
| NO <sub>3</sub> <sup>-</sup>  | 0.00  | -0.29 |
| NO <sub>2</sub> <sup>-</sup>  | 0.05  | 0.00  |
| pCO <sub>2</sub>              | 0.16  | 0.01  |

### Text 3. Relationships of nutrient concentrations and pCO<sub>2</sub> with GDP and waste water discharge

The GDP and WD in Wuxi City were presented in Fig. S2. Clearly, GDP gradually increased from 1992 to 2001, and rapidly increased between 2001 and 2006. The WD showed a slight decrease from 1998 to 2000, and then rapidly increased from 2000 to 2006.

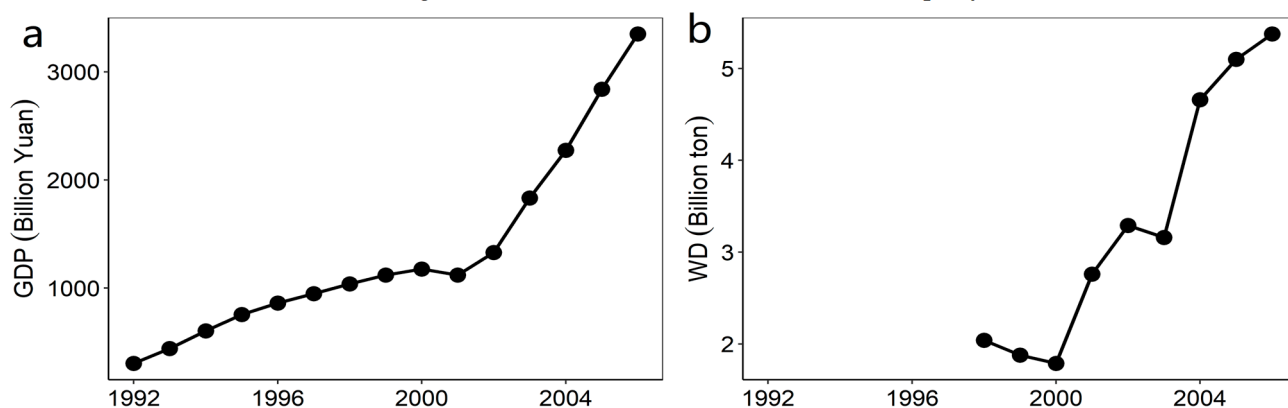

**Figure S2.** Gross domestic production (GDP)(a) and wastewater discharge (WD)(b) in Wuxi City (China) from 1992 to 2006.

The correlations between GDP and nutrient concentrations were distinct in 2 periods (1992–1996 and 1996–2006). Annual TN concentration in Taihu Lake was significantly correlated with the annual GDP in Wuxi city ( $p < 0.01$ ), while TP concentration was only significantly related to GDP during 1992–1996. Moreover, the significant and positive relationship between annual waste water discharges and TN concentration was clear (Fig. S3(d),  $p < 0.01$ ). In addition, the annual GDP and waste water discharges in Wuxi city were significantly and positively correlated with annual pCO<sub>2</sub> in Taihu Lake (Fig. S3(c) and (f)).

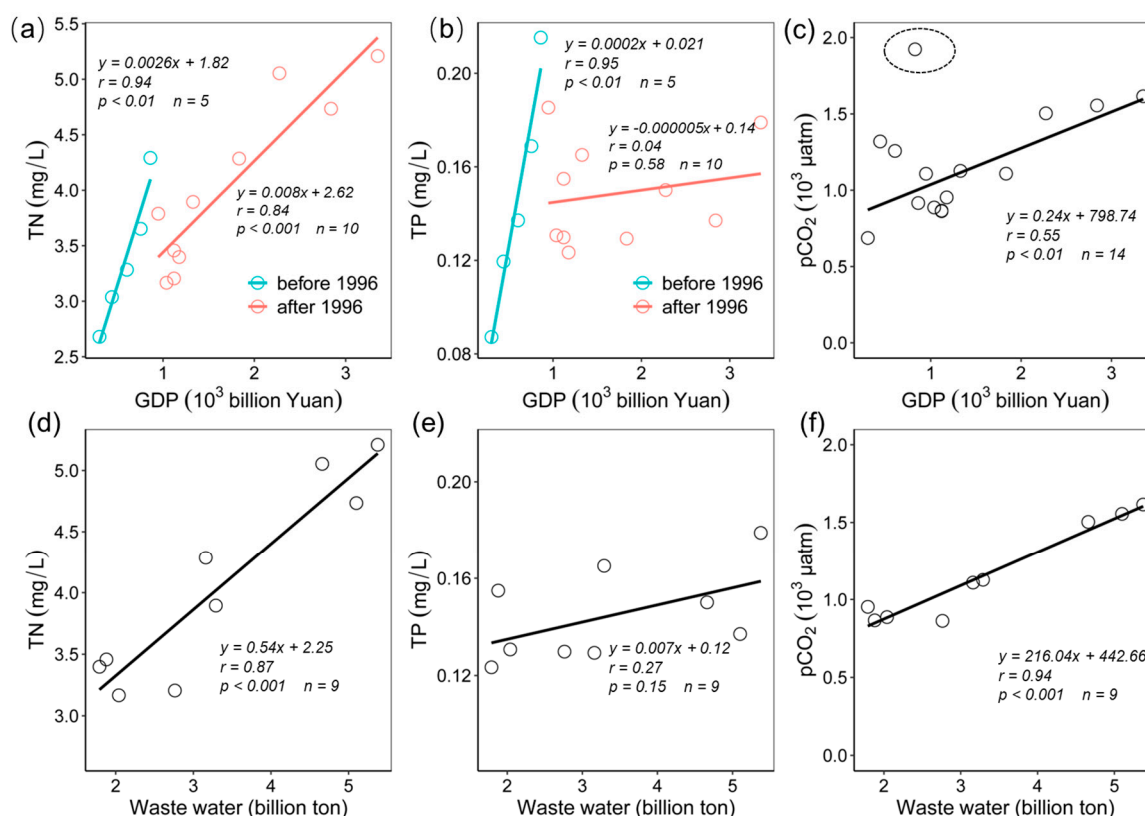

**Figure S3.** Correlations between GDP and wastewater discharge in Wuxi city and annual mean concentrations of TN (**a,d**), TP (**b,e**), and pCO<sub>2</sub> (**c,f**), respectively. Data used here are the annual average values of whole dataset during 1992–2006.

## Reference

1. Wanninkhof, R., Relationship between wind speed and gas exchange over the ocean revisited. *Limnol. Oceanogr. Methods* **2014**, *12*, 351–362. <https://doi.org/10.4319/lom.2014.12.351>
2. Benson, B.B., Krause, D., The concentration and isotopic fractionation of oxygen dissolved in freshwater and seawater in equilibrium with the atmosphere. *Limnol. Oceanogr.* **1984**, *29*, 620–632. <https://doi.org/10.4319/lo.1984.29.3.0620>
